# Supplementary material
Source: PubMed Central journal article supplement (PMC3993305)
Supplement: AEM.00342-14_zam999105322so1.pdf [file AEM.00342-14_zam999105322so1.pdf]

## Supplemental Material

The supplemental material contains:

**Figure S1 - Relative abundances of all 31 amplicons for all individuals at 9, 18 and 36 months, respectively.**

**Figure S2 - Raw distributions (scatter plots) for the fold change analysis presented in Figure 2**

**Figure S3 - Correlations between gut microbiota (columns), and cohort parameters of growth, body composition, breastfeeding, iron supplementation duration and nutrition (rows) at 9 months**

**Table S1 – Information about estimations of breast milk and iron intake**

**Table S2 – Overview of measured nutritional parameters**

**Table S3 – Overview of parameters of growth and body composition**

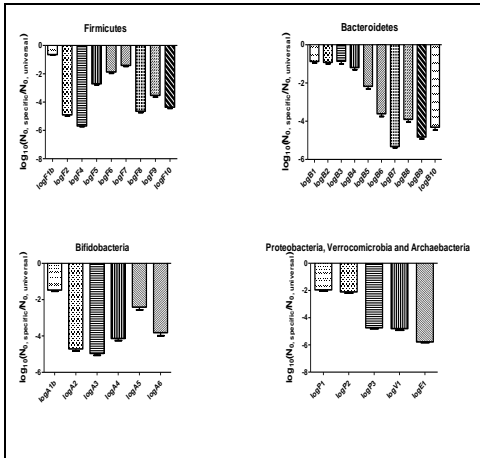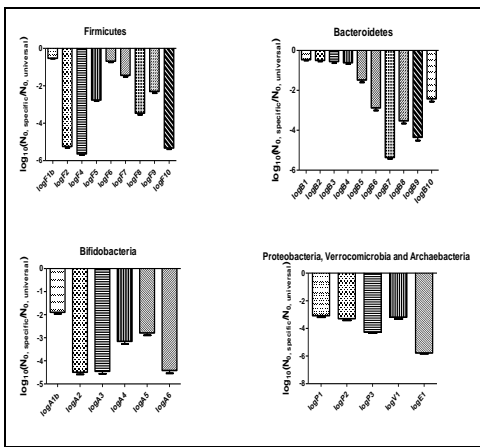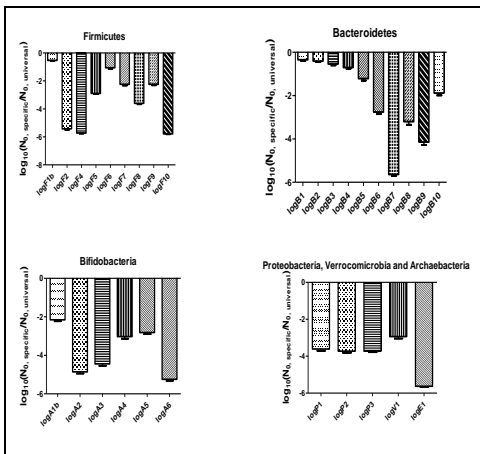

**Supplemental Figure S1:  $\log_{10}$ -transformed normalized relative abundances of the 31 amplicons, named as described in Table 1, presented as mean  $\pm$  SEM for 9 months (first panel), 18 months (middle panel) and 36 months (last panel), respectively. Note that comparison of abundances between different amplicons does not give meaningful interpretations.**

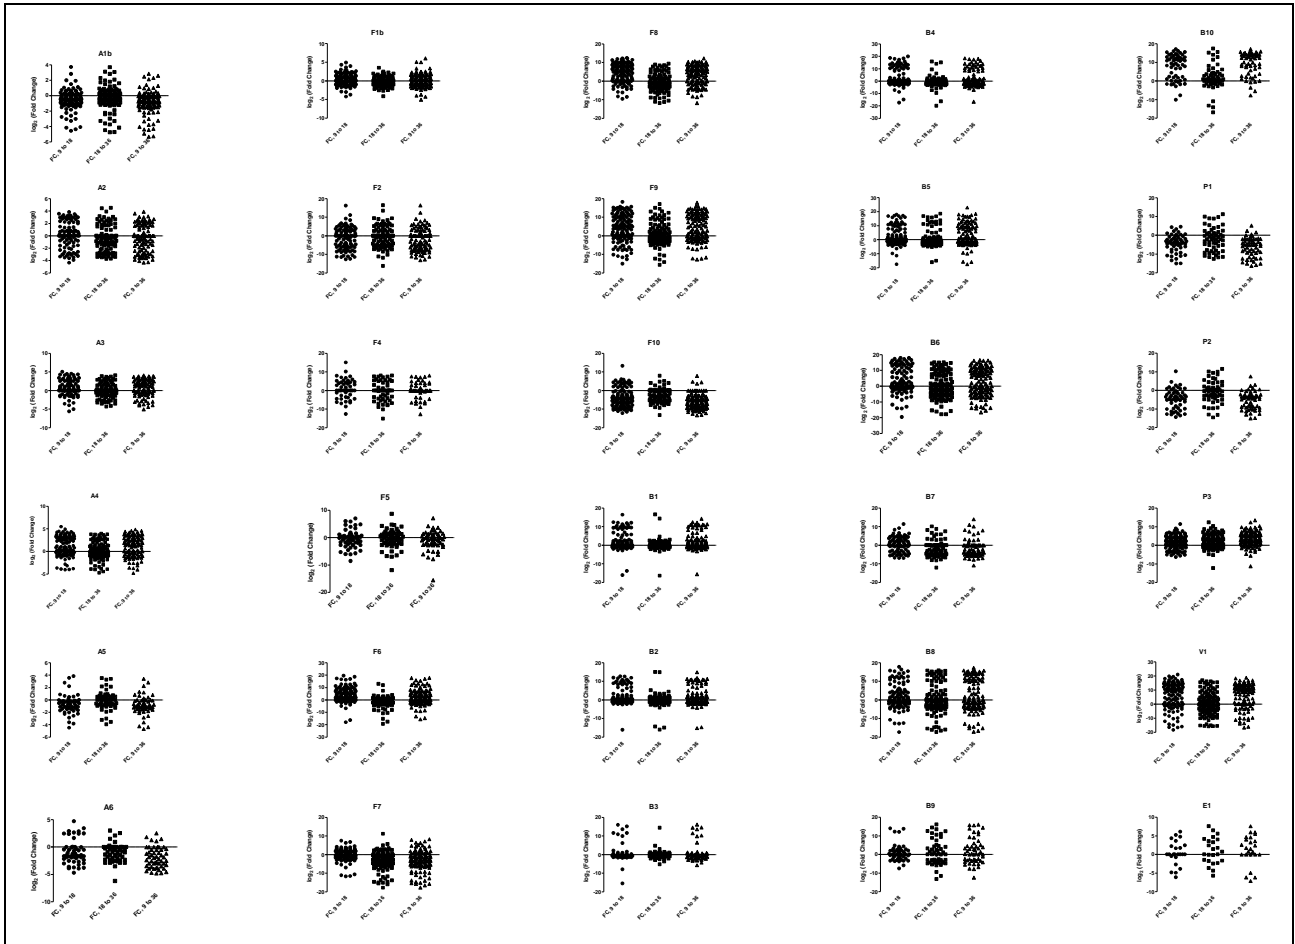

**Supplemental Figure S2: Raw distributions (scatter plots) for the  $\log_2$  fold changes (FC) presented in Figure 2. For each amplicon, named as in Table 1, FC from 9 to 18 months, FC from 18 to 36 months, and FC from 9 to 36 months is presented.**

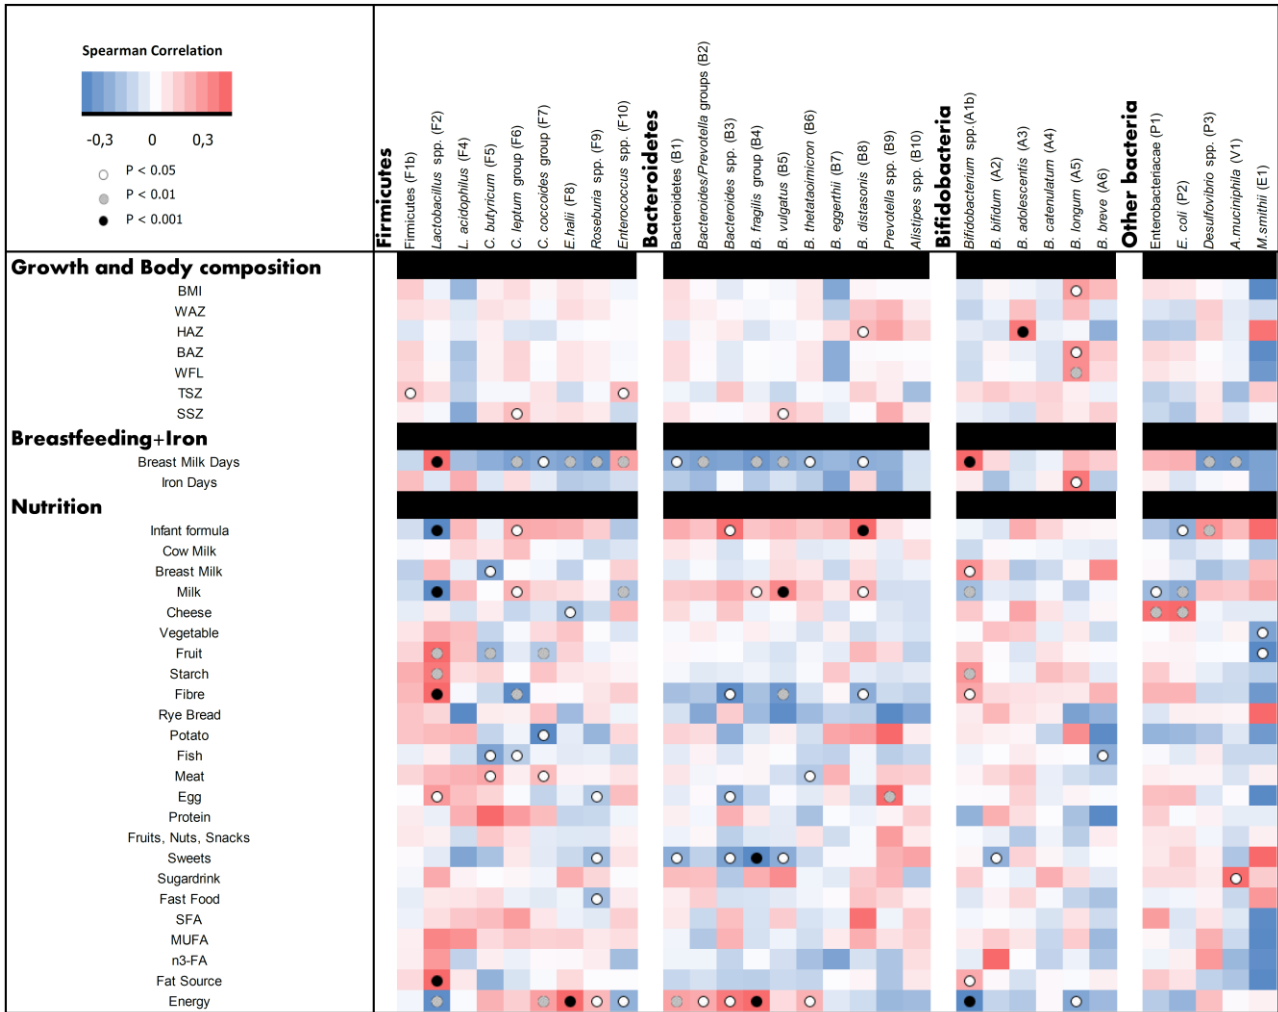

**Supplemental Figure S3:** Spearman map of correlations between gut microbiota (columns), and cohort parameters of growth, body composition, breastfeeding, iron supplementation duration and nutrition (rows) at 9 months. Color gradient denotes Spearman R value. Dots indicate significant correlations of  $p < 0.05$ ;  $q = 0.62$  (white),  $p < 0.01$ ;  $q = 0.32$  (grey) and  $p < 0.001$ ;  $q = 0.08$  (black), where  $q$  is false discovery rate.

| <b>Name</b>                 | <b>Explanation</b>                                              | <b>9<br/>months</b> | <b>18<br/>months</b> | <b>36<br/>months</b> |
|-----------------------------|-----------------------------------------------------------------|---------------------|----------------------|----------------------|
| <b>Breast Milk<br/>Days</b> | Days after birth, where infant was partially or fully breastfed | X                   | X                    | X                    |
| <b>Iron Days</b>            | Estimated number of days with iron drop supplementation         | X                   |                      |                      |

**Table S1** – Quantitative estimations of breastfeeding and iron supplementation was carried out at the indicated timepoints based on parental reporting. BrMilkDays is the number of days with either partial or exclusive breastfeeding as estimated by the mothers. Iron Days was created as a continuous variable based on the individually reported frequency of iron drop supplementation.

| Name                        | Explanation                                                        | 9 months | 18 months | 36 months |
|-----------------------------|--------------------------------------------------------------------|----------|-----------|-----------|
| <b>Infant formula</b>       | Infant formula (g)                                                 | X        | X         |           |
| <b>Cow Milk</b>             | Cow milk (g)                                                       | x        | X         | X         |
| <b>Breast Milk</b>          | Breast milk intake (estimated by number of daily feedings) (g)     | X        |           |           |
| <b>Milk</b>                 | Cow milk+infant formula+breastfeeding estimate (g)                 | X        | X         | X         |
| <b>Cheese</b>               | Cheese and cheese products (g)                                     | X        | X         | X         |
| <b>Vegetable</b>            | Vegetables and vegetable products (g)                              | X        | X         | X         |
| <b>Fruit</b>                | Fresh, dried, frozen, fruit porridge, soup (kJ)                    | X        | X         | X         |
| <b>Starch</b>               | Grains, starch (g)                                                 | X        | X         | X         |
| <b>Fibre</b>                | Nutritional fibers (g)                                             | X        | X         | X         |
| <b>Rye Bread</b>            | Danish rye bread (kJ)                                              | X        | X         | X         |
| <b>Potato</b>               | Cooked and baked potatoes (kJ)                                     | X        | X         | X         |
| <b>Fish</b>                 | Fish and fish products (g)                                         | X        | X         | X         |
| <b>Meat</b>                 | Meat, meat products, poultry and poultry products (g)              | X        | X         | X         |
| <b>Egg</b>                  | Eggs and egg products (g)                                          | X        | X         | X         |
| <b>Protein</b>              | Protein (g)                                                        | X        | X         | X         |
| <b>Fruits, Nuts, Snacks</b> | Fruit, marmalade, sugar, nuts, almond, dried fruit (kJ)            | X        | X         | X         |
| <b>Sweets</b>               | Cakes, candy, chocolate, ice-cream (kJ)                            | X        | X         | X         |
| <b>Sugardrink</b>           | Sugared beverages (kJ)                                             | X        | X         | X         |
| <b>Fast Food</b>            | Burgers, hotdogs, spring rolls, French fries, pizza, sausages (kJ) | X        | X         | X         |
| <b>SFA</b>                  | Saturated fatty acids (g)                                          | X        | X         | X         |
| <b>MUFA</b>                 | Mono-unsaturated fatty acids (g)                                   | X        | X         | X         |
| <b>n3-FA</b>                | n-3 poly-unsaturated fatty acids (g)                               | X        | X         | X         |
| <b>Fat Source</b>           | Fats and fats products (g)                                         | X        | X         | X         |
| <b>Energy</b>               | Total daily energy intake/weight (kg)                              | X        | X         | X         |

**Table S2** – Nutritional parameters

At the indicated timepoints, nutritional parameters were estimated based on nutritional questionnaires as daily intake in grams (g) or kilojoule (kJ) relative to total daily intake. Energy was normalized to individual weight in kg.

| Name                        | Explanation                                                      | Birth | 5 Mo. | 9 Mo. | 18 Mo. | 36 Mo. |
|-----------------------------|------------------------------------------------------------------|-------|-------|-------|--------|--------|
| <b>BMI</b>                  | Body Mass Index<br>(Weight(kg)/[Height (m)] <sup>2</sup> )       |       |       | x     | x      | x      |
| <b>WAZ</b>                  | Weight-for-age Z-score                                           | x     | x     | x     | x      | x      |
| <b>HAZ</b>                  | Length-for-age Z-score                                           |       |       | x     | x      | x      |
| <b>BAZ</b>                  | BMI-for-age Z-score                                              | x     | x     | x     | x      | x      |
| <b>WFL</b>                  | Weight-for-length/height Z-score                                 |       |       | x     | x      | x      |
| <b>TSZ</b>                  | Triceps skinfold-for-age Z-score                                 |       |       |       |        | x      |
| <b>SSZ</b>                  | Subscapular skinfold-for-age Z-score                             |       |       |       |        | x      |
| <b>BIA-Resistance Index</b> | Bioimpedance, Resistance Index<br>(cm <sup>2</sup> /Ω)           |       |       |       |        | x      |
| <b>BIA-predicted FFM</b>    | Bioimpedance, predicted Fat Free Mass (kg)                       |       |       |       |        | x      |
| <b>BIA-FFM Index</b>        | Bioimpedance, predicted Fat Free Mass Index (cm <sup>2</sup> /Ω) |       |       |       |        | x      |
| <b>DXA-FFM</b>              | DXA-scan, Fat Free Mass (kg)                                     |       |       |       |        |        |
| <b>DXA-FM</b>               | DXA-scan, Fat Mass (kg)                                          |       |       |       |        |        |
| <b>DXA-FFM Index</b>        | DXA-scan, Fat Free Mass Index<br>(cm <sup>2</sup> /Ω)            |       |       |       | x      |        |
| <b>DXA-FM Index</b>         | DXA-scan, Fat Mass Index<br>(cm <sup>2</sup> /Ω)                 |       |       |       | x      |        |

**Table S3** – Parameters of growth and body composition were estimated at the indicated timepoints.  
Mo. : Months.
